# Supplementary material for: Fucoidan isolated from Ascophyllum nodosum alleviates gut microbiota dysbiosis and colonic inflammation in antibiotic-treated mice
Source: Royal Society of Chemistry journal article supplement (doi:10.1039/d0fo00668h), 2020-01-01

**Table S1.** The composition of the standard maintenance diet.

| Ingredients    | Proportion (%) |
|----------------|----------------|
| Corn starch    | 28.2           |
| Wheat bran     | 27.0           |
| Fish meal      | 5.2            |
| Soy bean flour | 17.3           |
| Wheat flour    | 16             |
| Yeast powder   | 1              |
| Bone meal      | 2              |
| Salt           | 1              |
| Vitamin Mix    | 1              |
| Mineral Mix    | 1.3            |
| Total          | 100            |

**Table S2.** The numbers of sequences recorded in each group.

|         | Ctrl-14      | CiMe-14        | ANP-CiMe-14  | Ctrl-42        | CiMe+NR-42     | CiMe+ANP-42    |
|---------|--------------|----------------|--------------|----------------|----------------|----------------|
| 1       | 50935        | 52052          | 46850        | 66748          | 65493          | 63455          |
| 2       | 57017        | 58643          | 46847        | 74002          | 67645          | 59882          |
| 3       | 55907        | 50208          | 49516        | 71765          | 64970          | 57616          |
| 4       | 49720        | 51157          | 49202        | 74678          | 67914          | 55667          |
| 5       | 49026        | 49676          | 41120        | 73555          | 68044          | 66218          |
| Average | 52521±3682.9 | 52347.2±3635.0 | 46707±3367.9 | 72149.6±3206.4 | 66813.2±1462.8 | 60567.6±4285.5 |
| Min     | 49026        | 49676          | 41120        | 66748          | 64970          | 55667          |

**Fig. S1.** FT-IR spectrum of ANP.

**Fig. S2.** Body weight gains of mice were measured weekly during the experiment. Data are expressed as mean  $\pm$  SD (n=8 per group), \* $p$  < 0.05, \*\* $p$  < 0.01, \*\*\* $p$  < 0.001, and \*\*\*\* $p$  < 0.001 by the Tukey's HSD tests.

**Fig. S3.** The total numbers of OTUs recorded in each group. Data are expressed as mean  $\pm$  SD (n=5 per group), \* $p$  < 0.05, \*\* $p$  < 0.01, and \*\*\* $p$  < 0.001 by the Tukey's HSD tests.

**Fig. S4.** The relative proportions of main phyla in different groups at the level. Ctrl-14 vs CiMe-14 (A), CiMe-14 vs ANP-CiMe-14 (B), and CiMe-14 vs CiMe+ANP-42 (C). Data are expressed as mean  $\pm$  SD (n=5 per group), \* $p$  < 0.05 and \*\* $p$  < 0.01 by the Student t-tests.

**Fig. S5.** The relative proportions in different groups at the phylum (A), order (B), class (C), family (D), and genus (E) level.

**Fig. S6.** Difference in dominant microorganisms between groups based on LDA>3.5.

**Fig. S7.** The main microbiotas relative proportions in different groups at the genera level. Data are expressed as mean  $\pm$  SD (n=5 per group), \* $p$  < 0.05, \*\* $p$  < 0.01, and \*\*\* $p$  < 0.001 by Kruskal-Wallis tests.

Fig. S1.

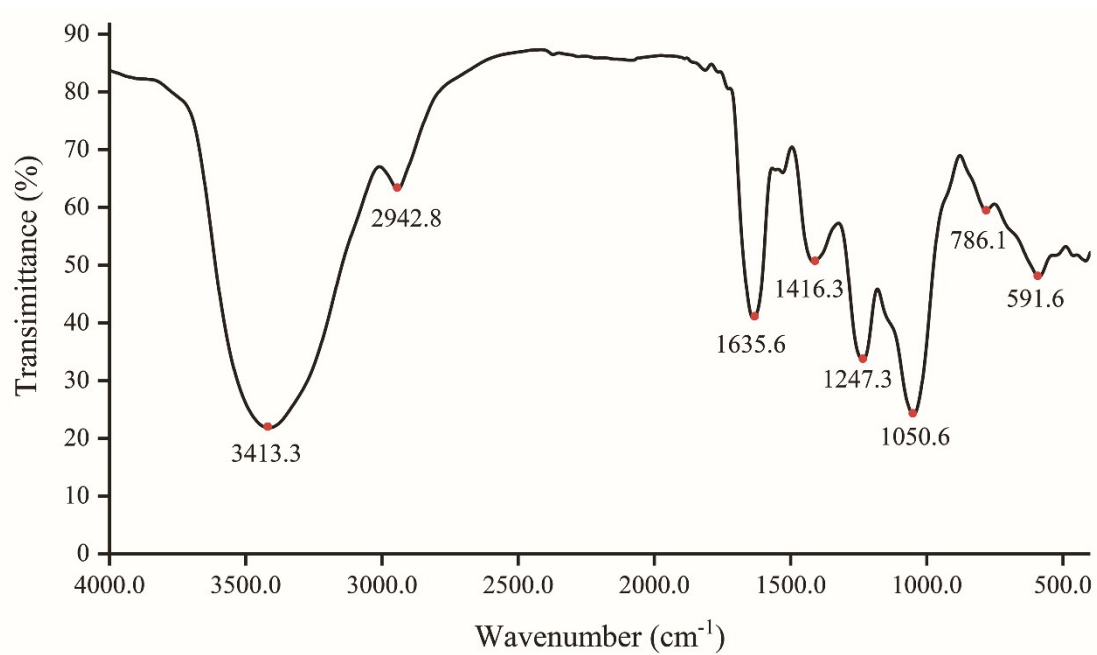

Fig. S2.

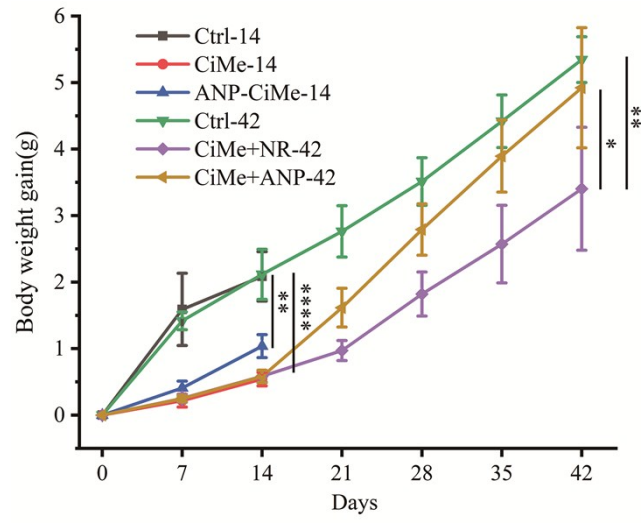

Fig. S3.

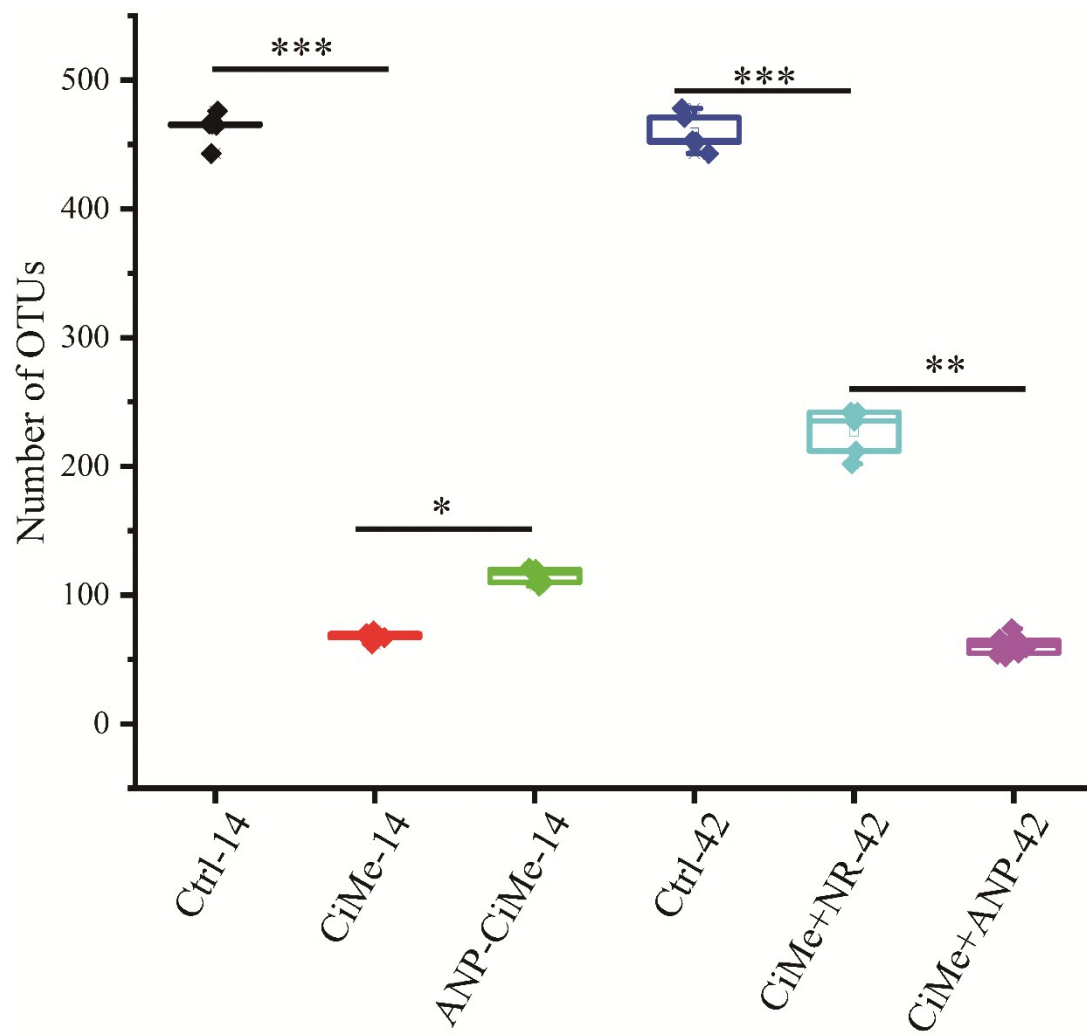

**Fig. S4.**

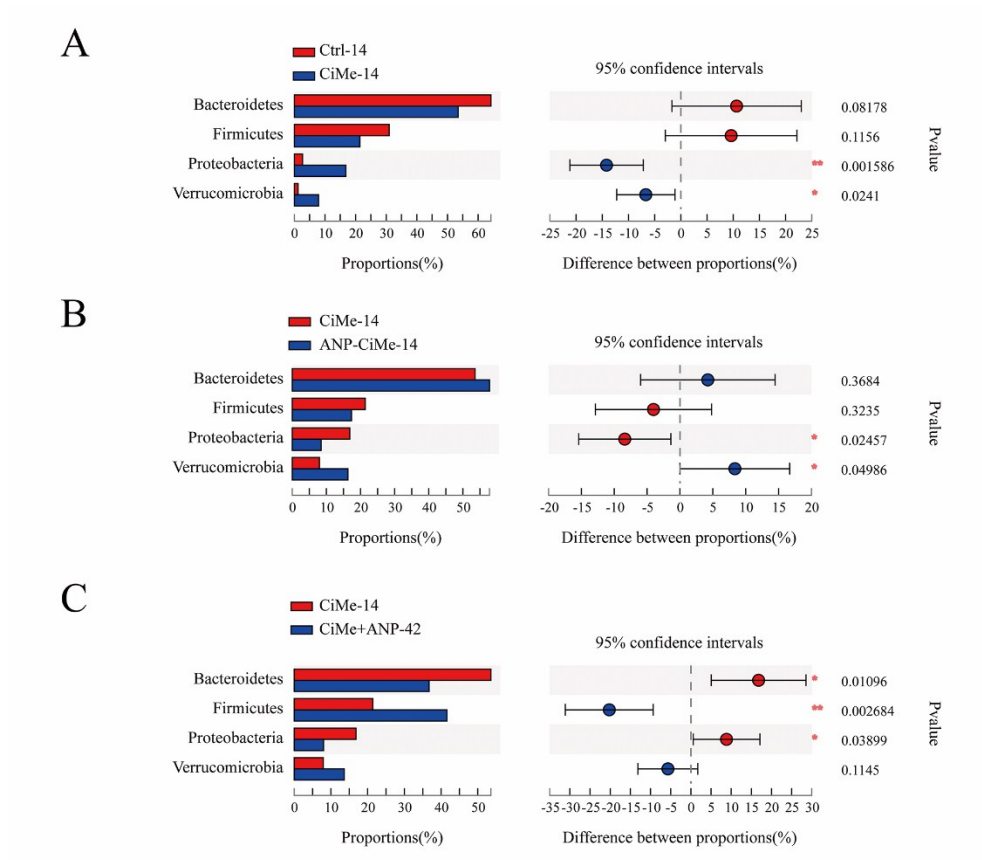

**Fig. S5.**

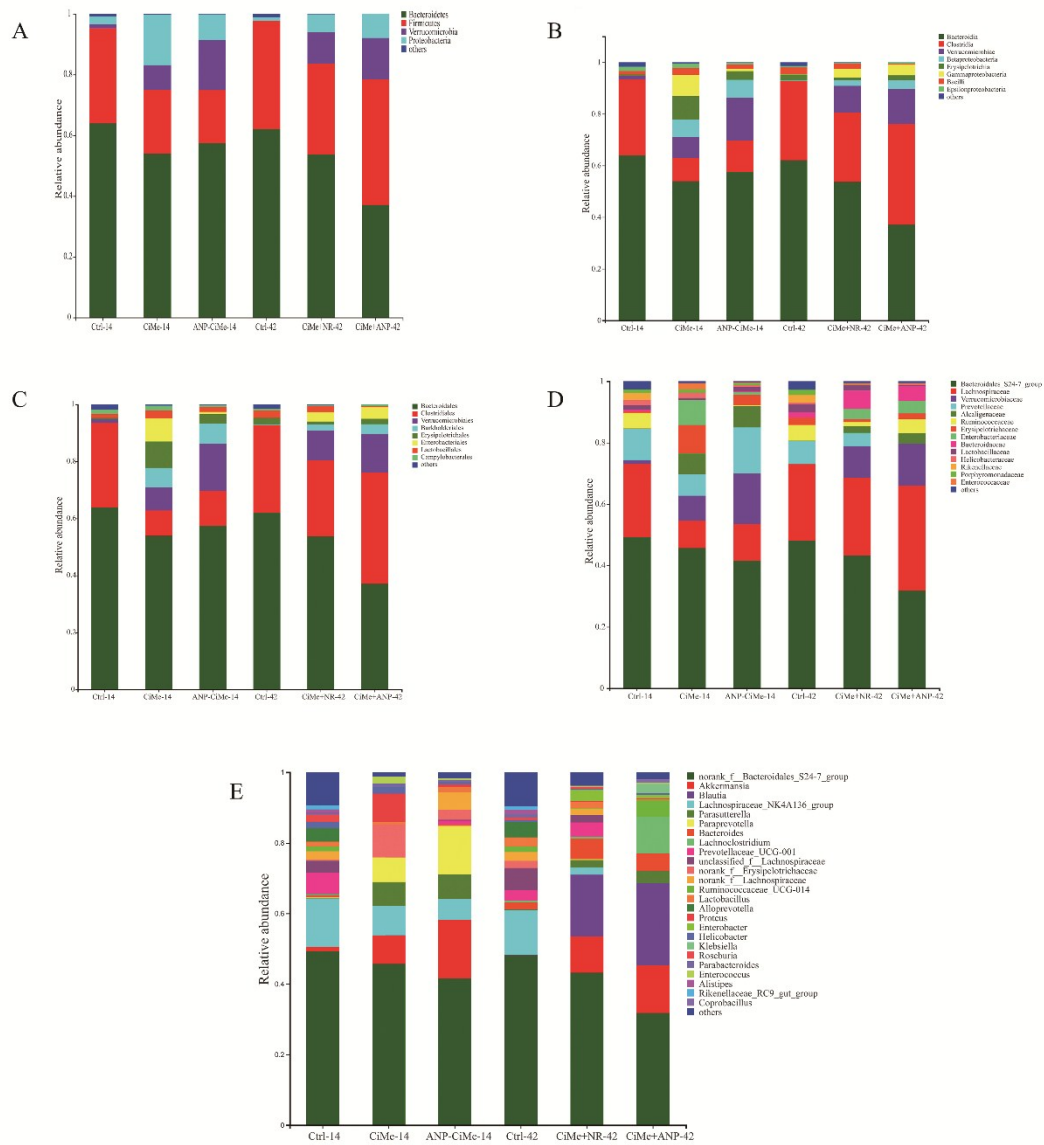



Fig. S6.

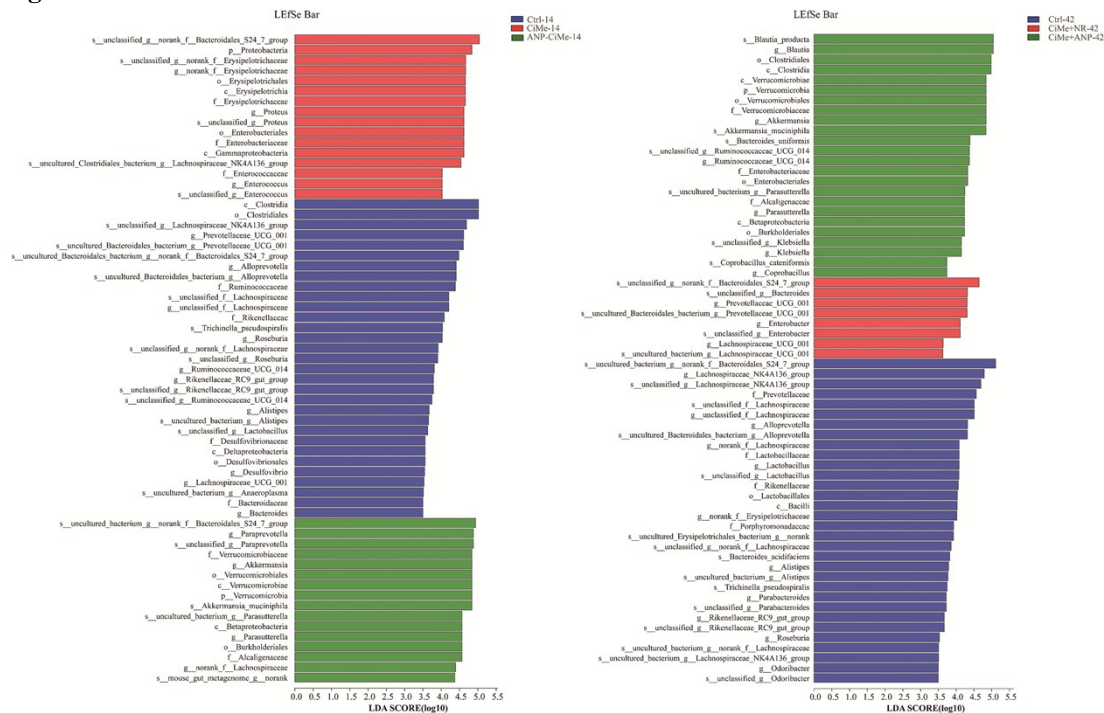

Supplement: d0fo00668h2.pdf [file d0fo00668h2.pdf]
